# Supplementary material for: Turn Up the Heat—Food and Clinical Escherichia coli Isolates Feature Two Transferrable Loci of Heat Resistance
Source: PubMed Central journal article supplement (PMC5383660; doi:10.3389/fmicb.2017.00579), 2017-04-07
Supplement: Image1.pdf [file Image1.pdf]

# Supplementary Figure 1

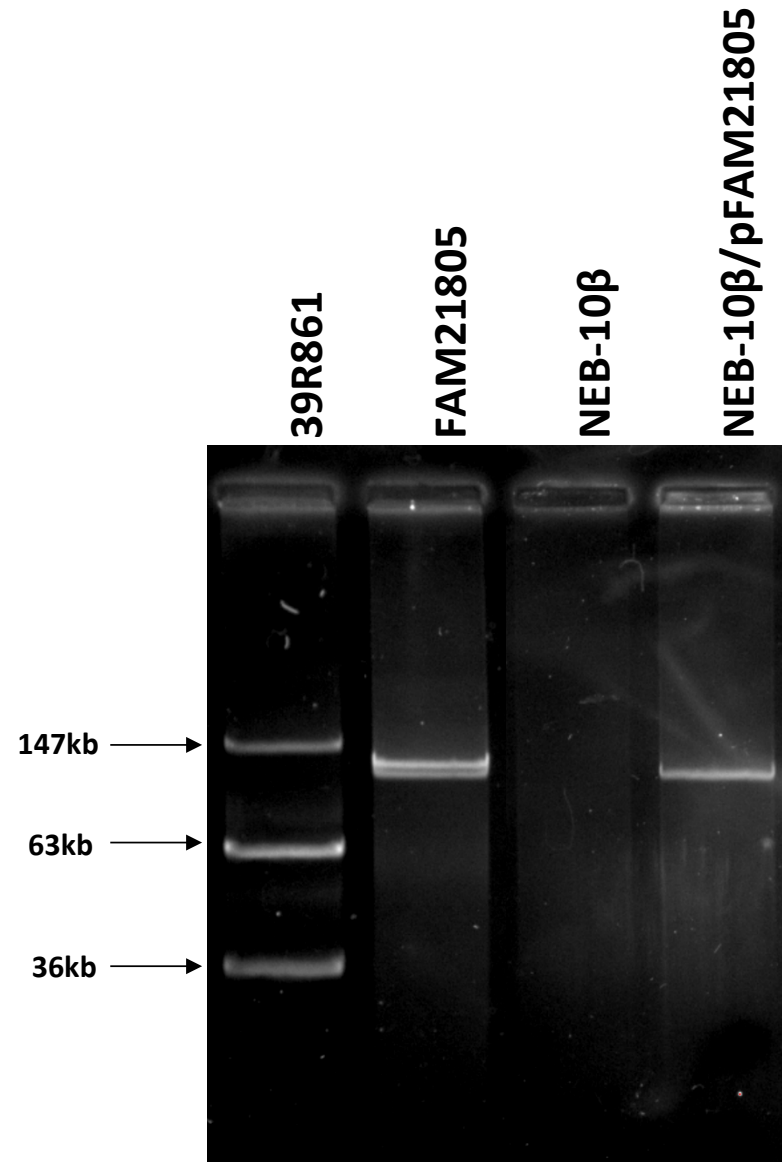

**Suppl. Fig. 1.** Gel electrophoresis of plasmids purified from *E. coli* strain 39R861 (reference with plasmids of known depicted sizes), FAM21805 (two plasmids), laboratory *E. coli* strain NEB-10 $\beta$  and NEB-10 $\beta$  with pFAM21805 inserted by electroporation.
